# Supplementary material for: Rain Shelter Cultivation Reduces Root Rot Incidence of Panax notoginseng by Altering Root Exudates and Bacterial Communities under Micro-Irrigation and Fertilization
Source: MDPI journal article supplement (doi:10.3390/agronomy13051257), 2023-04-28
Supplement: s1 [file s1]

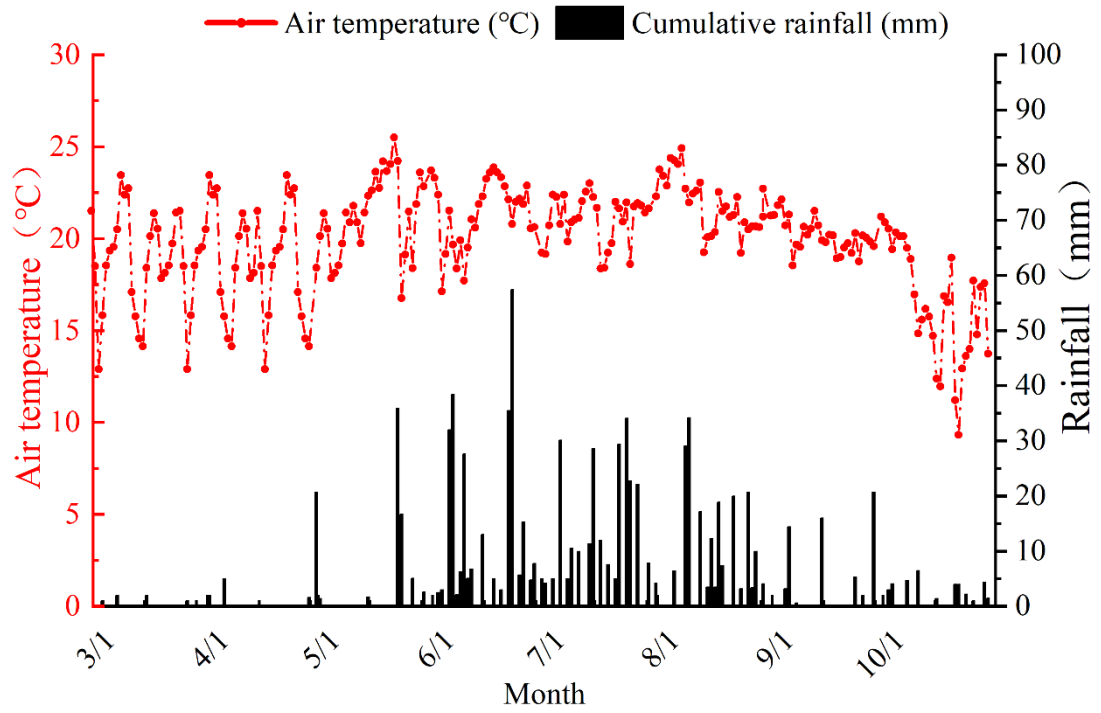

**Figure S1.** The cumulative rainfall and air temperature in field experiments (2021).

**Table S1.** Effects of rain shelter and fertilizer on soil enzyme activity.

|             |       | Field |                       |       | Pot |                       |       |
|-------------|-------|-------|-----------------------|-------|-----|-----------------------|-------|
|             |       | df    | F                     | Sig   | df  | F                     | Sig   |
| Sucrase     | W     | 1     | 365.024               | 0.000 | 1   | 1586.047              | 0.000 |
|             | F     | 1     | 627.779               | 0.000 | 1   | 1153.972              | 0.000 |
|             | W * F | 1     | 2.357                 | 0.163 | 1   | 109.202               | 0.000 |
|             |       |       | R <sup>2</sup> =0.989 |       |     | R <sup>2</sup> =0.996 |       |
| Urease      | W     | 1     | 62.2                  | 0.000 | 1   | 24.438                | 0.001 |
|             | F     | 1     | 29.584                | 0.001 | 1   | 69.319                | 0.000 |
|             | W * F | 1     | 1.183                 | 0.308 | 1   | 7.216                 | 0.028 |
|             |       |       | R <sup>2</sup> =0.891 |       |     | R <sup>2</sup> =0.899 |       |
| Phosphatase | W     | 1     | 97.633                | 0.000 | 1   | 335.439               | 0.000 |
|             | F     | 1     | 49.732                | 0.000 | 1   | 165.285               | 0.000 |
|             | W * F | 1     | 3.198                 | 0.112 | 1   | 101.954               | 0.000 |
|             |       |       | R <sup>2</sup> =0.931 |       |     | R <sup>2</sup> =0.982 |       |
| Catalase    | W     | 1     | 77.471                | 0.000 | 1   | 228.2                 | 0.000 |
|             | F     | 1     | 92.197                | 0.000 | 1   | 49.185                | 0.000 |
|             | W * F | 1     | 16.006                | 0.004 | 1   | 8.865                 | 0.018 |
|             |       |       | R <sup>2</sup> =0.943 |       |     | R <sup>2</sup> =0.963 |       |

The W, F, and W\*F indicates the (non- ) rain-shelter, (non-) fertilizer, and its interaction, respectively. The effects of rain shelter and fertilization on soil enzyme activity using general linear model univariate with LSD

**Table S2.** The effects of rain shelter and fertilizer on on syringic acid (a), para-coumaric acid (b), ferulic acid (c), 3-indoleacetic acid (d), vanillin acid (e), Phthalic acid (f), and p-hydroxybenzoic acid (g), secreted from roots of *Panax Notoginseng*.

|       | P-hydroxybenzoic acid |         |       | Vanillin acid         |         |       | Syringic acid         |        |       | Para-coumaric acid    |        |       | Ferulic acid          |        |       | 3-indoleacetic acid   |        |       | Phthalic acid         |        |       |
|-------|-----------------------|---------|-------|-----------------------|---------|-------|-----------------------|--------|-------|-----------------------|--------|-------|-----------------------|--------|-------|-----------------------|--------|-------|-----------------------|--------|-------|
|       | df                    | F       | Sig   | df                    | F       | Sig   | df                    | F      | Sig   | df                    | F      | Sig   | df                    | F      | Sig   | df                    | F      | Sig   | df                    | F      | Sig   |
| W     | 1                     | 139.738 | 0.000 | 1                     | 44.366  | 0.000 | 1                     | 39.427 | 0.000 | 1                     | 10.534 | 0.012 | 1                     | 22.096 | 0.002 | 1                     | 0.512  | 0.495 | 1                     | 12.638 | 0.007 |
| F     | 1                     | 32.807  | 0.000 | 1                     | 8.508   | 0.019 | 1                     | 51.467 | 0.000 | 1                     | 63.106 | 0.000 | 1                     | 76.5   | 0.000 | 1                     | 90.542 | 0.000 | 1                     | 14.694 | 0.005 |
| W * F | 1                     | 58.946  | 0.000 | 1                     | 120.429 | 0.000 | 1                     | 82.42  | 0.000 | 1                     | 7.7    | 0.024 | 1                     | 2.26   | 0.171 | 1                     | 0.459  | 0.517 | 1                     | 0.434  | 0.529 |
|       | R <sup>2</sup> =0.954 |         |       | R <sup>2</sup> =0.939 |         |       | R <sup>2</sup> =0.939 |        |       | R <sup>2</sup> =0.877 |        |       | R <sup>2</sup> =0.899 |        |       | R <sup>2</sup> =0.889 |        |       | R <sup>2</sup> =0.692 |        |       |

The W, F, and W\*F indicates the (non- ) rain-shelter, (non-) fertilizer, and its interaction, respectively. *The effects of rain shelter and fertilizer on phenolic acid using general linear model univariate with LSD*

**Table S3.** The Effects of rain shelter and fertilizer on incidence of root rot.

| Incidence of root rot | Field                 |         |       | Pot                   |         |       |
|-----------------------|-----------------------|---------|-------|-----------------------|---------|-------|
|                       | df                    | F       | Sig   | df                    | F       | Sig   |
| W                     | 1                     | 309.495 | 0.000 | 1                     | 676.459 | 0.000 |
| F                     | 1                     | 6.592   | 0.033 | 1                     | 10.978  | 0.011 |
| W * F                 | 1                     | 0.522   | 0.490 | 1                     | 1.839   | 0.212 |
|                       | R <sup>2</sup> =0.966 |         |       | R <sup>2</sup> =0.984 |         |       |

The W, F, and W\*F indicates the (non- ) rain-shelter, (non-) fertilizer, and its interaction, respectively. *The effects of rain shelter and fertilizer on incidence of root rot using general linear model univariate with LSD*
